# Supplementary material
Source: PubMed Central journal article supplement (PMC8464183)
Supplement: mmc1.pdf [file mmc1.pdf]

## CCS-OSCE student satisfaction survey

### Introduction

Students in their sixth year of a Degree in Medicine take the Objective, Structured Clinical Examination (OSCE) upon completing the degree and are then awarded a Master's Degree. As a result of the situation caused by COVID-19, a virtual, online computer-based case simulation test (CCS-OSCE) was designed on various platforms.

With this survey, we want to know students' satisfaction with the CCS-OSCE.

--

### Form

Date (drop-down menu: June 6 or June 20)

Age

Sex

University

### Part I. General assessment

**What was your level of satisfaction with the CCS-OSCE simulation test?**

(1 very dissatisfied, 2 dissatisfied, 3 satisfied, 4 very satisfied, 5 extremely satisfied)

**How would you evaluate the information received prior to the CCS-OSCE?**

(1 none, 2 insufficient, 3 adequate, 4 good, 5 excellent)

**Do you believe that what the CCS-OSCE is and what you had to do in it was properly explained?**

(1 very little, 2 little, 3 adequate, 4 good, 5 excellent)

**Do you believe the preparation received (acquisition of competences) during the degree allowed you to successfully take the CCS-OSCE?**

(1 very little, 2 little, 3 adequate, 4 good, 5 excellent)

**Indicate your level of satisfaction with the online platform on which the CCS-OSCE was taken.**

(1 very dissatisfied, 2 dissatisfied, 3 satisfied, 4 very satisfied, 5 extremely satisfied)

**What was your level of stress before beginning the test?**

(1 totally calm - 5 maximum stress level)

**What feelings did the CCS-OSCE provoke before you took it?**

Anxiety and/or nervousness

Fear

Curiosity

Indifference

Other:

**Assess the organization on the day of the CCS-OSCE test.**

(1 very bad, 2 bad, 3 fair, 4 good, 5 excellent)

**Assess the platform used for taking the CCS-OSCE test.**

(1 very bad, 2 bad, 3 fair, 4 good, 5 excellent)

**Assess your prior knowledge obtained during your degree in regard to taking the CCS-OSCE test.**

(1 very little, 2 little, 3 fair, 4 much, 5 very much)

**Did you have any problems with the internet connection during the test? YES/NO**

If so, describe the problem...

**Did you have a simultaneous video chat during the test to confirm your identity and provide support in the chat?**

Yes

No

**If so, did the simultaneous video chat system during the test seem appropriate for confirming your identity and providing support in the chat?**

(1 inappropriate, 2 not very appropriate, 3 appropriate, 4 very appropriate, 5 extremely appropriate)

## **Part II. Assess the model of the station on the university's platform**

**Assess your impression of the images included in certain stations**

(1 very bad, 2 bad, 3 fair, 4 good, 5 very good)

**Assess how the interactive images included in certain stations of the Sakai platform seemed to you**

(1 very bad, 2 bad, 3 fair, 4 good, 5 very good)

**Assess how the videos included in certain stations seemed to you**

(1 very bad, 2 bad, 3 fair, 4 good, 5 very good)

**Assess how the multiple-choice questions with one correct answer seemed to you**

(1 very bad, 2 bad, 3 fair, 4 good, 5 very good)

**Assess how the multiple-choice questions with several correct answers seemed to you (multiple responses)**

(1 very bad, 2 bad, 3 fair, 4 good, 5 very good)

**Assess how the multiple-choice questions with several correct answers (multiple response) with feedback seemed to you**

(1 very bad, 2 bad, 3 fair, 4 good, 5 very good)

**Assess how the drag-and-drop questions seemed to you**

(1 very bad, 2 bad, 3 fair, 4 good, 5 very good)

## **Part III. Assessment of the stations**

**Assess the lower back pain station according to how simple or complex it was to complete**

(1 very simple, 2 simple, 3 fair, 4 difficult, 5 very difficult)

**Assess the 12-minute time limit for the lower back pain station.**

(1 completely insufficient, 2 insufficient, 3 adequate but tight, 4 sufficient, 5 more than sufficient)

**Assess the assault and injury report station according to how simple or complex it was to complete**

(1 very simple, 2 simple, 3 fair, 4 difficult, 5 very difficult)

**Assess the 12-minute time limit for the assault and injury report station.**

(1 completely insufficient, 2 insufficient, 3 adequate but tight, 4 sufficient, 5 more than sufficient)

**Assess the vaginal itching station according to how simple or complex it was to complete** (1 very

simple, 2 simple, 3 fair, 4 difficult, 5 very difficult)

**Assess the 12-minute time limit for the vaginal itching station.**

(1 completely insufficient, 2 insufficient, 3 adequate but tight, 4 sufficient, 5 more than sufficient)

**Assess the right to information station according to how simple or complex it was to complete**

(1 very simple, 2 simple, 3 fair, 4 difficult, 5 very difficult)

**Assess the 12-minute time limit for the right to information station.**

(1 completely insufficient, 2 insufficient, 3 adequate but tight, 4 sufficient, 5 more than sufficient)

**Assess the facial paralysis station according to how simple or complex it was to complete**

(1 very simple, 2 simple, 3 fair, 4 difficult, 5 very difficult)

**Assess the 12-minute time limit for the facial paralysis station.**

(1 completely insufficient, 2 insufficient, 3 adequate but tight, 4 sufficient, 5 more than sufficient)

**Assess the polytrauma station according to how simple or complex it was to complete** (1 very simple, 2

simple, 3 fair, 4 difficult, 5 very difficult)

**Assess the 12-minute time limit for the polytrauma station.** (1 completely insufficient, 2 insufficient, 3

adequate but tight, 4 sufficient, 5

more than sufficient)

**Assess the psychiatric interview station according to how simple or complex it was to complete** (1 very

simple, 2 simple, 3 fair, 4 difficult, 5 very difficult)

**Assess the 12-minute time limit for the psychiatric interview station.** (1 completely insufficient, 2

insufficient, 3 adequate but tight, 4 sufficient, 5

more than sufficient)

**Assess the respiratory illness station according to how simple or complex it was to complete** (1 very

simple, 2 simple, 3 fair, 4 difficult, 5 very difficult)

**Assess the 12-minute time limit for the respiratory illness station.**

(1 completely insufficient, 2 insufficient, 3 adequate but tight, 4 sufficient, 5 more than sufficient)

**Assess the abdominal distention station according to how simple or complex it was to complete**

(1 very simple, 2 simple, 3 fair, 4 difficult, 5 very difficult)

**Assess the 12-minute time limit for the abdominal distention station.**

(1 completely insufficient, 2 insufficient, 3 adequate but tight, 4 sufficient, 5 more than sufficient)

**Assess the digital rectal examination station according to how simple or complex it was to complete**  
(1 very simple, 2 simple, 3 fair, 4 difficult, 5 very difficult)

**Assess the 12-minute time limit for the digital rectal examination station.**  
(1 completely insufficient, 2 insufficient, 3 adequate but tight, 4 sufficient, 5 more than sufficient)

**What station seemed most difficult to you? (indicate one)**

Lower back pain station,  
Assault and injury report station,  
Vaginal itching station  
Right to information station  
Facial paralysis station  
Polytrauma station  
Psychiatric interview station  
Respiratory illness station  
Abdominal distension station  
Digital rectal examination station

**What station seemed simplest to you?**

Lower back pain station,  
Assault and injury report station,  
Vaginal itching station  
Right to information station  
Facial paralysis station  
Polytrauma station  
Psychiatric interview station  
Respiratory illness station  
Abdominal distension station  
Digital rectal examination station

#### **Part IV. Overall evaluation**

**Indicate which clinical competences have been evaluated with the CCS-OSCE (indicate all that apply)**

Anamnesis  
Clinical examination  
Communication  
Skills and procedures  
Clinical judgment and diagnosis  
Preventative actions  
Professionalism and ethics

**Of the following competences, evaluate from 0 to 100 the percentage that you believe they have been evaluated on this test.**

Anamnesis  
Clinical examination  
Communication  
Skills and procedures  
Clinical judgment and diagnosis  
Preventative actions  
Professionalism and ethics

**Is this type of test (CCS-OSCE) useful for measuring competences in:**

Anamnesis (yes/no)  
Clinical examination (yes/no)

Communication (yes/no)  
Skills and procedures (yes/no)  
Clinical judgment and diagnosis (yes/no)  
Preventative actions (yes/no)  
Professionalism and ethics (yes/no)

**Did you have to study some of the competences evaluated on the CCS-OSCE on your own?**

Yes, no

**Did this test evaluate competences acquired in: (Select all that apply)**

- 1) The entire degree
- 2) Clinical courses
- 3) Rotations

**Do you think that the grades obtained on this CCS-OSCE are fair considering the possibility of copying on this type of test?**

(1. unfair (due to copying), 2 not very fair, 3 fair, 4 very fair, 5 extremely fair)

**How difficult did the CCS-OSCE seem to you?**

(1 very easy, 2 easy, 3 fair, 4 difficult, 5 very difficult)

**How did the type of medical problems presented seem to you with respect to the content seen during the degree?**

(1 inappropriate, 2 not very appropriate, 3 appropriate, 4 very appropriate, 5 extremely appropriate)

**Ignoring the fact that the CCS-OSCE is a test and thus is graded, how did it seem to you in terms of a learning experience?**

(1 very bad, 2 bad, 3 indifferent, 4 good, 5 excellent)

**How do you think you did on the CCS-OSCE?**

(1 bad, 2 fair, 3 good, 4 very good, 5 excellent)

**Evaluate your experience with the CCS-OSCE.**

(1 very bad, 2 bad, 3 fair, 4 good, 5 very good)

**What score (on a scale of 1-10) do you expect to earn after analyzing the CCS-OSCE?**

**In a single sentence, what the exam has given you?**

Nothing

Assurance that what I learned during my degree is useful

Only stress

Being tested in equal conditions as colleagues in other schools

A nice experience

**Do you want to include a broader, more open-ended comment on the CCS-OSCE? (Here you can leave us any comments you were not able to express beforehand)**

|                                                                                                                    |                                                                                                                                      |
|--------------------------------------------------------------------------------------------------------------------|--------------------------------------------------------------------------------------------------------------------------------------|
| Las siguientes preguntas podrían ser de una anamnesis normal todas ellas, por eso ninguna resta puntos.            | All of the following questions could be from a normal anamnesis. For this reason, points will not be lost for selecting any of them. |
| Pero de las 15 debe seleccionar las 10 que considere más importantes para el diagnóstico diferencial de este caso. | Of these 15, you must select the 10 that you consider most important for the differential diagnosis of this case.                    |
| Si selecciona más de 10 se le restaran puntos por cada uno de más.                                                 | If you select more than 10, you will lose points for each additional question selected.                                              |
| Presione comprobar antes de siguiente para obtener respuesta a sus preguntas.                                      | Click verify before next to obtain the response to your questions.                                                                   |
| Seleccione una o más de una:                                                                                       | Select one or more than one:                                                                                                         |
| 1. ¿Ha notado dolor en oído derecho?                                                                               | 1. Have you noted pain in the right ear?                                                                                             |
| 2. ¿Se ha notado más torpe al intentar coger las cosas?                                                            | 2. Have you found yourself more clumsy when attempting to pick things up?                                                            |
| 3. ¿Ha notado cambios en el sabor de la comida?                                                                    | 3. Have you noted changes in the taste of food?                                                                                      |
| 4. Antecedentes personales                                                                                         | 4. Personal medical history.                                                                                                         |
| 5. ¿Ha notado si se va para los lados o ha notado inestabilidad o vértigo?                                         | 5. Have you noted that you lean to the side or have you noted instability or vertigo?                                                |
| 6. Antecedentes familiares                                                                                         | 6. Family medical history                                                                                                            |
| 7. ¿Es hipertenso?                                                                                                 | 7. Are you hypertensive?                                                                                                             |
| 8. ¿Ha notado pérdida de fuerza en algunas de las extremidades?                                                    | 8. Have you noted any loss of strength in any of your limbs?                                                                         |
| 9. ¿Ha notado ruidos en los oídos en estos últimos tiempos?                                                        | 9. Have you noted hearing noises in your ears recently?                                                                              |
| 10. ¿Desde cuándo ha notado la parálisis facial?                                                                   | 10. Since when have you noted the facial paralysis?                                                                                  |
| 11. ¿Sabe si tiene el colesterol alto?                                                                             | 11. Do you know if you have high cholesterol?                                                                                        |
| 12. ¿Ha notado pérdida auditiva?                                                                                   | 12. Have you noted hearing loss?                                                                                                     |
| 13. ¿Ha notado hormigueo o sensaciones raras en la cara al tocarla o al afeitarse?                                 | 13. Have you noted tingling or strange sensations in your face when you touch it or shave?                                           |
| 14. ¿Le ha supurado el oído en alguna ocasión?                                                                     | 14. Has your ear festered on any occasion?                                                                                           |
| 15. ¿Ha notado dificultades al tragar?                                                                             | 15. Have you noted difficulties swallowing?                                                                                          |
| Comprobar                                                                                                          | Verify                                                                                                                               |
| Seleccione una o más de una:                                                                                       | Select one or more than one:                                                                                                         |
| 1. ¿Ha notado dolor en oído derecho? No, sólo he tenido dolor de cabeza en algunas ocasiones.                      | 1. Have you noted pain in the right ear? No, I have only had headaches occasionally.                                                 |
| 2. ¿Se ha notado más torpe al intentar coger las cosas?                                                            | 2. Have you found yourself more clumsy when attempting to pick things up?                                                            |
| 3. ¿Ha notado cambios en el sabor de la comida? Sí.                                                                | 3. Have you noted changes in the taste of food? Yes.                                                                                 |
| 4. Antecedentes personales. Sin interés, enfermedades infantiles.                                                  | 4. Personal medical history. Nothing of note, childhood illnesses.                                                                   |
| 5. ¿Ha notado si se va para los lados o ha notado inestabilidad o vértigo? No, nunca.                              | 5. Have you noted that you lean to the side or have you noted instability or vertigo? No, never.                                     |
| 6. Antecedentes familiares                                                                                         | 6. Family medical history                                                                                                            |
| 7. ¿Es hipertenso?                                                                                                 | 7. Are you hypertensive?                                                                                                             |
| 8. ¿Ha notado pérdida de fuerza en algunas de las extremidades? No, ninguna.                                       | 8. Have you noted any loss of strength in any of your limbs? No, none.                                                               |
| 9. ¿Ha notado ruidos en los oídos en estos últimos tiempos? No, nunca.                                             | 9. Have you noted hearing noises in your ears recently? No, never.                                                                   |
| 10. ¿Desde cuándo ha notado la parálisis facial? Hace una semana como ya le he dicho.                              | 10. Since when have you noted the facial paralysis? Since one week ago, as I told you.                                               |
| 11. ¿Sabe si tiene el colesterol alto?                                                                             | 11. Do you know if you have high cholesterol?                                                                                        |

|                                                                                                                                                        |                                                                                                                                                           |
|--------------------------------------------------------------------------------------------------------------------------------------------------------|-----------------------------------------------------------------------------------------------------------------------------------------------------------|
| 12. ¿Ha notado pérdida auditiva? Sí, por el oído derecho he ido perdiendo audición.                                                                    | 12. Have you noted hearing loss? Yes, I've been losing hearing in my right ear.                                                                           |
| 13. ¿Ha notado hormigueo o sensaciones raras en la cara al tocarla o al afeitarse?                                                                     | 13. Have you noted tingling or strange sensations in your face when you touch it or shave?                                                                |
| 14. ¿Le ha supurado el oído en alguna ocasión? Sí, de modo intermitente desde hace dos meses, escaso de color negro y de mal olor y me preocupa mucho. | 14. Has your ear festered on any occasion? Yes, intermittently since two months ago, a small amount that is black and smells bad and it worries me a lot. |
| 15. ¿Ha notado dificultades al tragar? No.                                                                                                             | 15. Have you noted difficulties swallowing? No.                                                                                                           |
